# Supplementary material for: Heterogeneity in Disulfide Bond Reduction in IgG1 Antibodies Is Governed by Solvent Accessibility of the Cysteines
Source: MDPI journal article supplement (doi:10.3390/antib12040083), 2023-12-13
Supplement: s1 [file s1]

*Article*

# Heterogeneity in Disulfide Bond Reduction in IgG1 Antibodies Is Governed by Solvent Accessibility of the Cysteines

Ramakrishnan Natesan <sup>1,†</sup>, Andrew B. Dykstra <sup>2,†</sup>, Akash Banerjee <sup>1</sup> and Neeraj J. Agrawal <sup>1,\*</sup>

<sup>1</sup> Amgen Inc., Process Development, 360 Binney St., Cambridge, MA 02141, USA; rnatesan@amgen.com (R.N.); abaner12@amgen.com (A.B.)

<sup>2</sup> Amgen Inc., Process Development, Thousand Oaks, CA 91320, USA; adykstra@amgen.com

\* Correspondence: agrawaln@amgen.com; Tel.: +1-(617)-444-5503

<sup>†</sup> These authors contributed equally to this work.

**Keywords:** peptide mapping, differential alkylation, disulfide bond, molecular dynamics, SASA

## Supplementary Information

**Table S1.** Table showing the mapping between cysteine residues and the associated antibody domains for the four different mAbs used in our study. The cysteines have been numbered using their mature linear numbering. The corresponding IMGT [5] and Kabat [6] numbering for the variable domain, and the EU numbering [7] for the whole mAb are shown alongside. The linkages on the left indicate paired cysteines and \* denotes that HC:C229 and HC:C232 are linked to their respective counterparts on the second chain. mAb1 and mAb2 contain  $\kappa$  light chains, while mAb3 and mAb4 contain  $\lambda$  light chains.

| Cysteine residue numbering        |                                   |                                    |                                    | Domain          | Numbering |       |     | S-S bond type |
|-----------------------------------|-----------------------------------|------------------------------------|------------------------------------|-----------------|-----------|-------|-----|---------------|
| mAb1(IgG1 $\kappa$ )<br>(VK3/VH3) | mAb2(IgG1 $\kappa$ )<br>(VK1/VH1) | mAb3(IgG1 $\lambda$ )<br>(VL1/VH1) | mAb4(IgG1 $\lambda$ )<br>(VL2/VH2) |                 | IMGT      | Kabat | EU  |               |
| LC:C23                            | LC:C23                            | LC:C22                             | LC:C22                             | V <sub>L</sub>  | 23        | 23    | 23  | intrachain    |
| LC:C88                            | LC:C88                            | LC:C89                             | LC:C90                             | V <sub>L</sub>  | 104       | 88    | 88  | intrachain    |
| LC:C134                           | LC:C134                           | LC:C138                            | LC:C138                            | C <sub>L</sub>  |           |       | 134 | intrachain    |
| LC:C194                           | LC:C194                           | LC:C197                            | LC:C197                            | C <sub>L</sub>  |           |       | 194 | intrachain    |
| LC:C214                           | LC:C214                           | LC:C215                            | LC:C215                            | C <sub>L</sub>  |           |       | 214 | interchain    |
| HC:C223                           | HC:C220                           | HC:C231                            | HC:C231                            | C <sub>H1</sub> |           |       | 220 | interchain    |
| HC:C22                            | HC:C22                            | HC:C22                             | HC:C22                             | V <sub>H</sub>  | 23        | 22    | 22  | intrachain    |
| HC:C96                            | HC:C96                            | HC:C96                             | HC:C97                             | V <sub>H</sub>  | 104       | 92    | 96  | intrachain    |
| HC:C147                           | HC:C144                           | HC:C155                            | HC:C147                            | C <sub>H1</sub> |           |       | 147 | intrachain    |
| HC:C203                           | HC:C200                           | HC:C211                            | HC:C203                            | C <sub>H1</sub> |           |       | 200 | intrachain    |
| HC:C264                           | HC:C261                           | HC:C272                            | HC:C264                            | C <sub>H2</sub> |           |       | 261 | intrachain    |
| HC:C324                           | HC:C321                           | HC:C332                            | HC:C324                            | C <sub>H2</sub> |           |       | 321 | intrachain    |
| HC:C370                           | HC:C367                           | HC:C378                            | HC:C370                            | C <sub>H3</sub> |           |       | 367 | intrachain    |
| HC:C428                           | HC:C425                           | HC:C436                            | HC:C428                            | C <sub>H3</sub> |           |       | 425 | intrachain    |
| * HC:C229                         | HC:C226                           | HC:C237                            | HC:C229                            | Hinge           |           |       | 226 | hinge-hinge   |
| * HC:C232                         | HC:C229                           | HC:C240                            | HC:C232                            | Hinge           |           |       | 229 | hinge-hinge   |
| HC:C295                           | HC:C292                           | HC:C303                            | HC:C295                            | C <sub>H2</sub> |           |       | -   | intrachain    |
| HC:C305                           | HC:C302                           | HC:C313                            | HC:C305                            | C <sub>H2</sub> |           |       | -   | intrachain    |

**Table S2.** Table showing the Pearson correlation coefficient for the rate of reduction ( $k$ ) computed from peptide mapping data to the SASA values computed in molecular dynamics simulations. For all mAbs, we see an excellent linear correlation between  $k$  and SASA for all cysteine residues except for those in the hinges.

| Pearson r for $k$ vs SASA           | mAb1<br>(IgG1 $\kappa$ ) | mAb2<br>(IgG1 $\kappa$ ) | mAb3<br>(IgG1 $\lambda$ ) | mAb4<br>(IgG1 $\lambda$ ) |
|-------------------------------------|--------------------------|--------------------------|---------------------------|---------------------------|
| Intrachain, interchain, hinge, SEFL | 0.56                     | 0.74                     | 0.87                      | 0.87                      |
| Intrachain, interchain, hinge       | 0.67                     | 0.87                     | 1                         | 1                         |
| Intrachain, interchain, SEFL        | 0.88                     | 0.87                     | 0.87                      | 0.87                      |
| Intrachain, interchain              | 1                        | 1                        | 1                         | 1                         |

## SI Figures

|            |         |      |      |      |      |
|------------|---------|------|------|------|------|
| intrachain | HC:C22  | 0.04 | ND   | ND   | 0.02 |
|            | HC:C96  | 0.15 | 0.11 | 0.25 | 0.11 |
|            | HC:C147 | 0.53 | 0.13 | 0.21 | 0.12 |
|            | HC:C203 | 0.02 | 0.03 | 0.02 | 0.01 |
|            | HC:C264 | 0.15 | 0.11 | 0.22 | 0.15 |
|            | HC:C324 | ND   | ND   | ND   | ND   |
|            | HC:C370 | 0.13 | 0.10 | 0.22 | 0.17 |
|            | HC:C428 | 0.02 | 0.03 | 0.01 | 0.01 |
|            | LC:C23  | 0.26 | 1.00 | 0.15 | 0.15 |
| interchain | LC:C88  | 0.12 | ND   | 0.09 | 0.03 |
|            | LC:C134 | 0.12 | 0.07 | ND   | 0.01 |
|            | LC:C194 | 0.17 | 0.23 | 0.34 | 0.20 |
|            | LC:C214 | 0.09 | 0.17 | 0.68 | 0.21 |
|            | HC:C223 | ND   | ND   | ND   | ND   |
| hinge      | HC:C229 | 0.37 | 0.25 | 0.37 | 0.17 |
|            | HC:C232 | 0.39 | 0.31 | 0.39 | 0.16 |
| SEFL       | HC:C295 | 0.32 | 0.24 | 0.47 | 0.25 |
|            | HC:C305 | 0.08 | 0.07 | 0.09 | 0.07 |
|            |         | mAb1 | mAb2 | mAb3 | mAb4 |

**Figure S1.** Relative abundance of free cysteines tagged with NEM in native conditions. ND denotes residues for which the abundance was not measured.

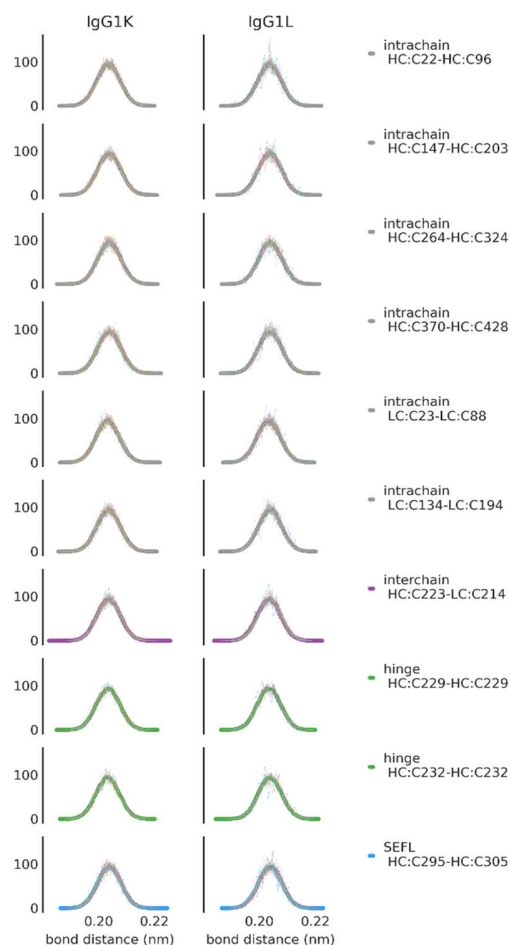

**Figure S2.** Distribution of S-S bond fluctuations in molecular dynamics simulations of IgG1 $\kappa$  and IgG1 $\lambda$  molecules (in duplicate, each 500 ns long), for the shown cysteine pairs. In each panel, the multiple thin lines correspond to the distributions computed for every 50 ns piece of the trajectories while the thick solid line denotes their average. We observed the S-S bond length to be normally distributed and the estimated variance ( $\sigma^2$ ) was used to compute the associated spring constant as  $\kappa_{SS} = \frac{k_B T}{\sigma^2}$ , where  $k_B$  is the Boltzmann constant and  $T$  is the absolute temperature, taken to be 300K. The distribution of  $\kappa_{SS}$  is shown in Figure 6(a) in the main manuscript.

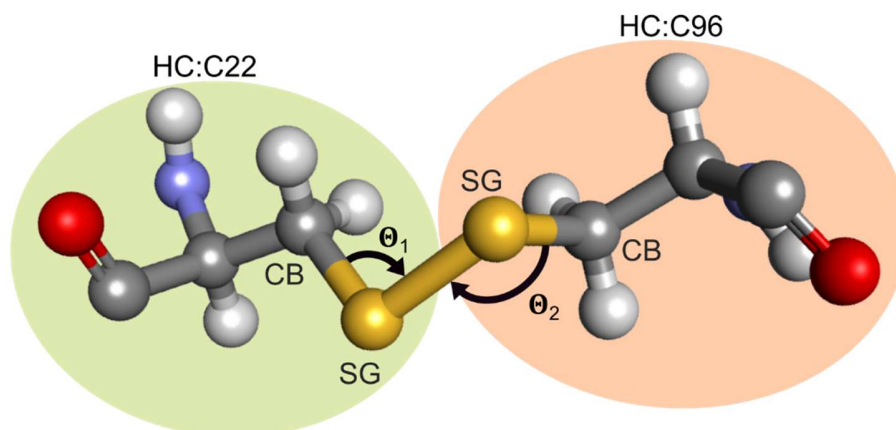

**Figure S3.** Schematic showing the disulfide bond between HC:C22 and HC:C96 in mAb1. Following Qin et. al. [32] we quantify the orientations of the thiols group in terms of angles  $\theta_1$  and  $\theta_2$  computed from the positions of the CB and SG atoms in each cysteine.

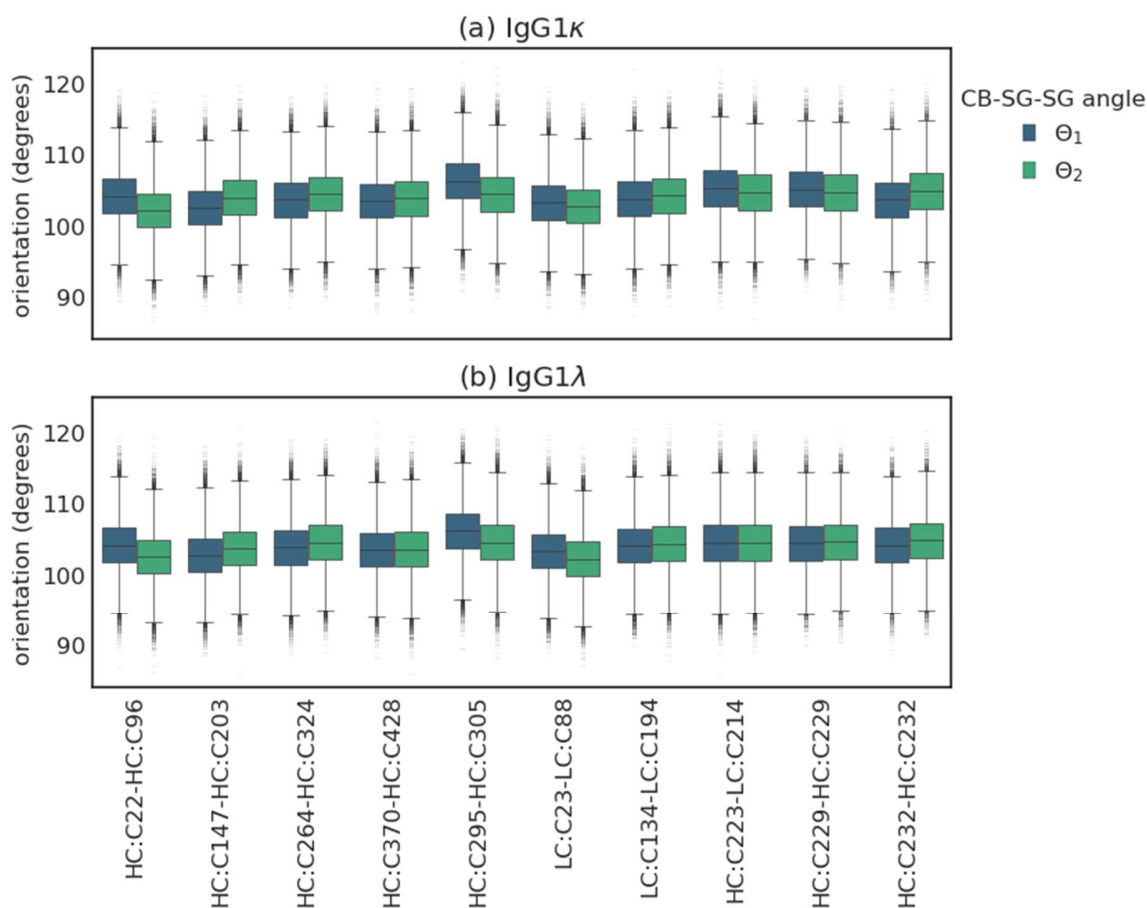

**Figure S4.** S-S bond angles  $\theta_1$  and  $\theta_2$  in molecular dynamics simulations of IgG1 $\kappa$  and IgG1 $\lambda$  molecules (in duplicate, each 500 ns long), for the shown cysteine pairs. The angles are defined in Supplementary Figure S3.
